# Supplementary figures and images for: NF-κB p50-deficient immature myeloid cell (p50-IMC) adoptive transfer slows the growth of murine prostate and pancreatic ductal carcinoma
Source: PubMed Central journal article supplement — J Immunother Cancer. 2020 Jan 13;8(1):e000244. doi: 10.1136/jitc-2019-000244 (PMC7057444; doi:10.1136/jitc-2019-000244), 2020-01-13

Suresh et al, Fig. S1

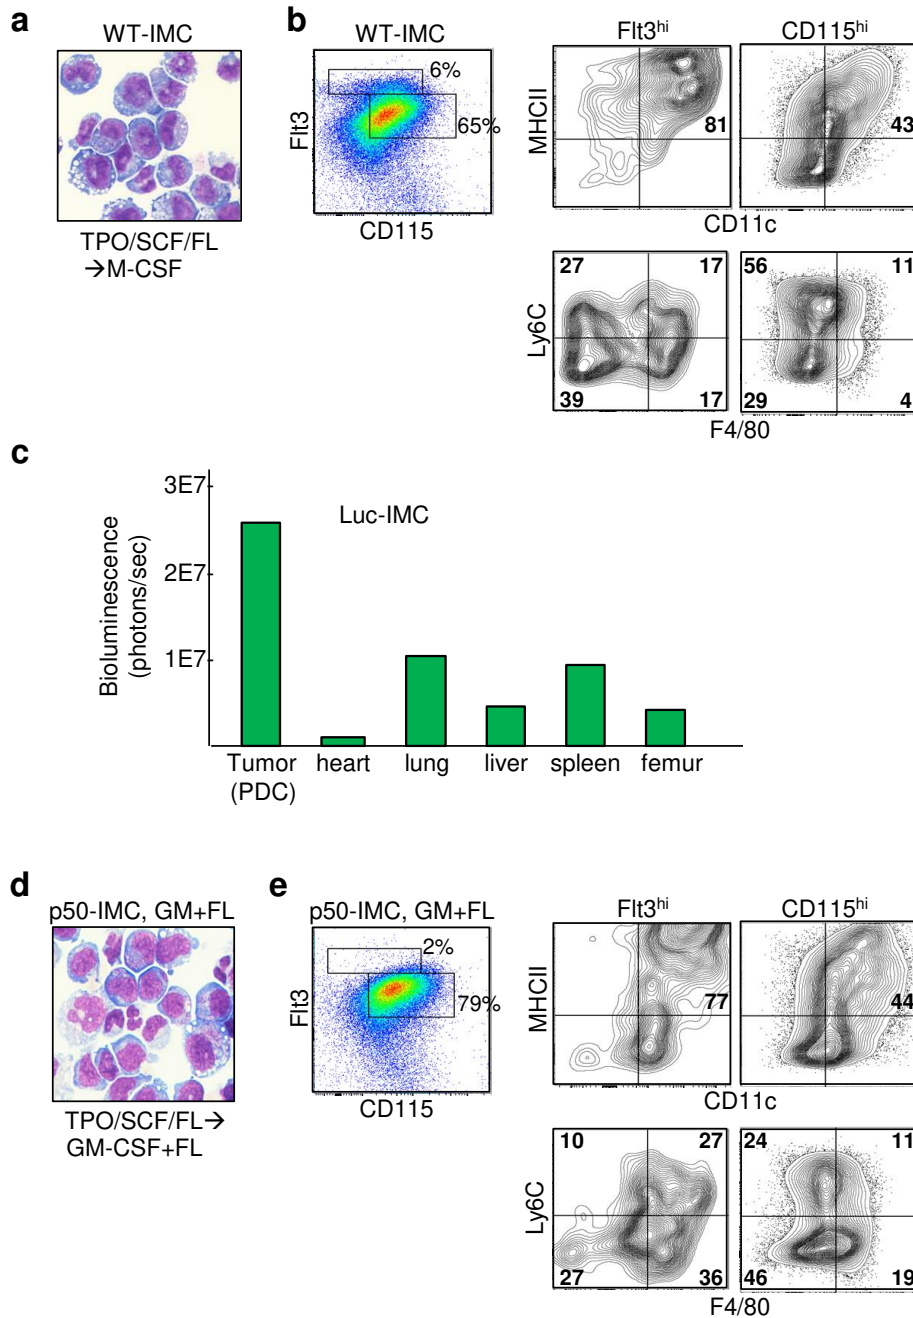

Suresh et al, Fig. S2

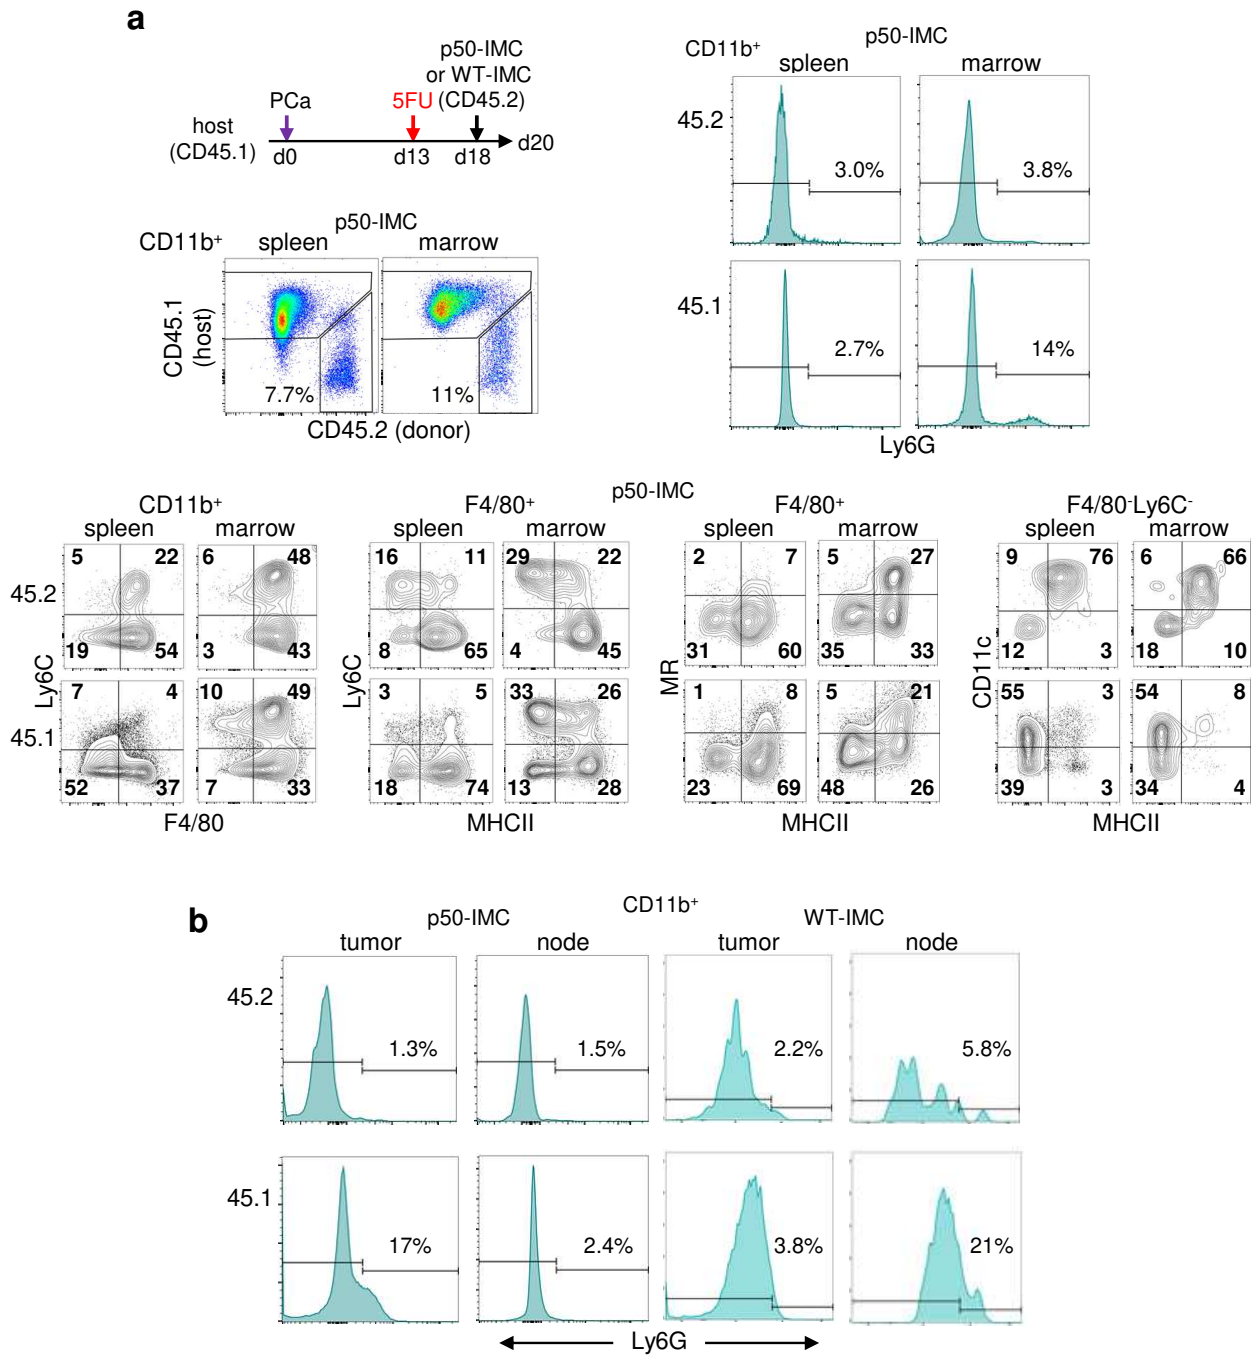

Suresh et al, Fig. S3

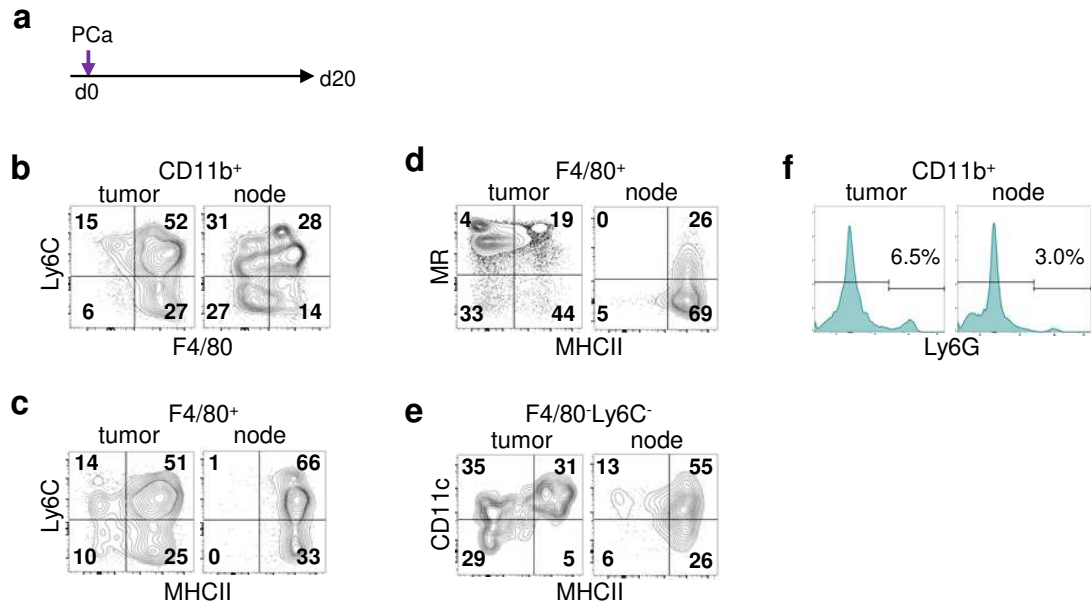

Suresh et al, Fig. S4

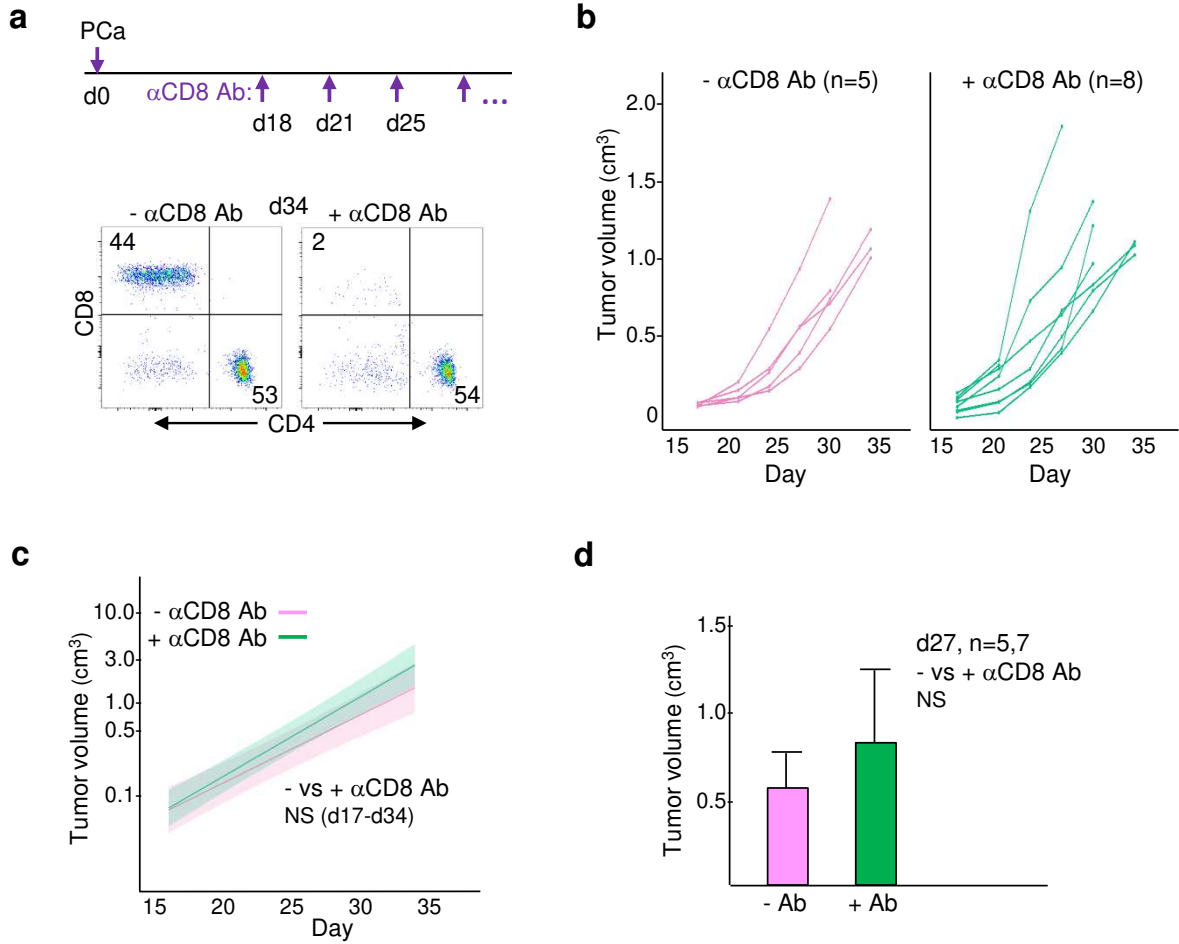

Supplement: jitc-2019-000244supp001.pdf [file jitc-2019-000244supp001.pdf]
